# Supplementary material for: The effect of hyperkalemia and long inter-dialytic interval on morbidity and mortality in patients receiving hemodialysis: a systematic review
Source: PubMed Central journal article supplement (PMC7833048; doi:10.1080/0886022x.2020.1871012), 2021-01-21
Supplement: IRNF_A_1871012_SM1290.pdf [file IRNF_A_1871012_SM1290.pdf]

**The effect of hyperkalaemia and long inter-dialytic interval on morbidity and mortality in patients receiving haemodialysis: a systematic review**

Danai Bem, Daniel Sugrue, Ben Wilding, Ina Zile, Karin Butler, David Booth, Eskinder Tafesse, Phil McEwan

**SUPPLEMENTARY MATERIAL**

**Table S1.** Search strategy in PubMed (MEDLINE and MEDLINE In-Process) for the identification of studies reporting the impact of HK and LIDI on patients receiving HD

| #                   | Search terms                                                                                                                                                                               |
|---------------------|--------------------------------------------------------------------------------------------------------------------------------------------------------------------------------------------|
| <b>Intervention</b> |                                                                                                                                                                                            |
| 1                   | hemodialysis[MeSH Terms]                                                                                                                                                                   |
| 2                   | hemodialysis[Title/Abstract] OR haemodialysis[Title/Abstract] OR hemofiltration[Title/Abstract] OR haemofiltration[Title/Abstract] OR dialysis[Title/Abstract] OR dialyses[Title/Abstract] |
| 3                   | #1 OR #2                                                                                                                                                                                   |
| <b>Population</b>   |                                                                                                                                                                                            |
| 4                   | hyperkalemia[MeSH Terms]                                                                                                                                                                   |
| 5                   | hyperkalemia[Title/Abstract] OR hyperkalaemia[Title/Abstract]                                                                                                                              |
| 6                   | "High potassium"[Title]                                                                                                                                                                    |
| 7                   | "inter-dialytic interval*"[Title/Abstract] OR "interdialytic interval*"[Title/Abstract] OR "intradialytic interval*"[Title/Abstract] OR LIDI[Title/Abstract]                               |
| 8                   | #4 OR #5 OR #6 OR #7                                                                                                                                                                       |
| <b>Combine</b>      |                                                                                                                                                                                            |
| 9                   | #3 AND #8                                                                                                                                                                                  |
| 10                  | #9 AND English[Language]                                                                                                                                                                   |

**Table S2.** Summary of baseline characteristics and main outcomes of identified studies (n=70) reporting frequency of HK in HD patients

| Author, year, country (trial ID)                                                   | Study design                              | HD & population specifics | Co-morbid conditions                                                                                                                            | S-K <sup>+</sup> levels (mmol/L) | Study subgroups (N)         | Pre-dialysis HK |                                                      |                                   |
|------------------------------------------------------------------------------------|-------------------------------------------|---------------------------|-------------------------------------------------------------------------------------------------------------------------------------------------|----------------------------------|-----------------------------|-----------------|------------------------------------------------------|-----------------------------------|
|                                                                                    |                                           |                           |                                                                                                                                                 |                                  |                             | Timepoint       | Outcome measure                                      | Value                             |
| <b>ESRD population (n = 40)</b>                                                    |                                           |                           |                                                                                                                                                 |                                  |                             |                 |                                                      |                                   |
| Balamuthusamy et al. 2017, USA (Datalink)                                          | Retrospective, observational, multicentre | Outpatients               | NR                                                                                                                                              | ≥5.5                             | Total population (1022)     | NR              | Prevalence - Proportion of patients with HK          | 9.0%                              |
|                                                                                    |                                           |                           |                                                                                                                                                 | 5.5–5.9                          | Moderate HK (346)           |                 |                                                      | 6.75%                             |
|                                                                                    |                                           |                           |                                                                                                                                                 | ≥6.0                             | Severe HK (346)             |                 |                                                      | 2.25%                             |
| Block et al. 2016, USA (NCT01764854)                                               | Phase 2 RCT, multicentre                  | Maintenance HD            | NR                                                                                                                                              | NR                               | PBO (35)                    | 1 month         | Proportion of patients with HK                       | 0.0%                              |
|                                                                                    |                                           |                           |                                                                                                                                                 | NR                               | Tenapanor (37)              |                 |                                                      | 8.1%                              |
| Borgia et al. 2019, Canada, UK, Spain, Israel, New Zealand, Australia (NCT0306852) | Phase 2 single-arm, multicentre           | Chronic HD (HCV infected) | Diabetes 32.0%; Hypertension 90.0%                                                                                                              | NR                               | Sofosbuvir/velpatasvir (59) | 3 months        | Proportion of patients with HK (reported as drug AE) | 5%                                |
| Chan et al. 2011, USA                                                              | Retrospective, observational, multicentre | Chronic HD                | Diabetes 50.9%; MI or CAD 18.1%; CHF 25.1%; Cerebrovascular accident 5.0%; PVD 17.4%                                                            | ≥6.5                             | ARB (5,828)                 | 24 months       | Proportion of patients with HK                       | 28.1%                             |
|                                                                                    |                                           |                           | Diabetes 53.2%; MI or CAD 20.0%; CHF 27.7%; Cerebrovascular accident 6.2%; PVD 18.4%                                                            | ≥6.5                             | ACEI (22,800)               |                 | Proportion of patients with HK                       | 30.2%                             |
| Charytan et al. 2017, USA (Spin-D; NCT02285920)                                    | Phase 2 RCT, multicentre                  | Maintenance HD            | NR                                                                                                                                              | >6.0                             | PBO (51)                    | 8 months        | Incidence rate                                       | 3.5 events per 100 patient-weeks  |
|                                                                                    |                                           |                           |                                                                                                                                                 | >6.0                             | SPL 12.5 mg/day (27)        |                 | Incidence rate                                       | 2.12 events per 100 patient-weeks |
|                                                                                    |                                           |                           |                                                                                                                                                 | >6.0                             | SPL 25.0 mg/day (26)        |                 | Incidence rate                                       | 2.18 events per 100 patient-weeks |
|                                                                                    |                                           |                           |                                                                                                                                                 | >6.0                             | SPL 50.0 mg/day (25)        |                 | Incidence rate                                       | 5.04 events per 100 patient-weeks |
| Charytan et al. 2019, USA (Spin-D; NCT02285920)                                    | Phase 2 RCT, multicentre                  | Maintenance HD            | Diabetes 47.1%; Hypertension 98.0%; Hyperlipidaemia 39.2%; CHF 19.6% Cerebrovascular accident 27.5%; PVD 11.8%; CHD/CAD 23.5%; Arrhythmia 13.7% | ≥6.0                             | PBO (NR)                    | 8 months        | Frequency - Proportion of patients with HK           | 15.6%                             |
|                                                                                    |                                           |                           | Diabetes 48.1%; Hypertension 88.9%; Hyperlipidaemia 33.3%; CHF 7.4% Cerebrovascular accident 14.8%; PVD 7.4%; CHD/CAD 3.7%; Arrhythmia 3.7%     | ≥6.0                             | SPL 12.5 mg/day (NR)        |                 | Frequency - Proportion of patients with HK           | 3.7%                              |
|                                                                                    |                                           |                           | Diabetes 53.8%; Hypertension 88.5%; Hyperlipidaemia 38.5%; CHF 15.4% Cerebrovascular accident 3.8%; PVD 15.4%; CHD/CAD 30.8%; Arrhythmia 7.7%   | ≥6.0                             | SPL 25.0 mg/day (NR)        |                 | Frequency - Proportion of patients with HK           | 0.0%                              |

| Author, year, country (trial ID)                                     | Study design                                                | HD & population specifics                | Co-morbid conditions                                                                                                          | S-K <sup>+</sup> levels (mmol/L) | Study subgroups (N)                                                                       | Pre-dialysis HK |                                                               |                                              |
|----------------------------------------------------------------------|-------------------------------------------------------------|------------------------------------------|-------------------------------------------------------------------------------------------------------------------------------|----------------------------------|-------------------------------------------------------------------------------------------|-----------------|---------------------------------------------------------------|----------------------------------------------|
|                                                                      |                                                             |                                          |                                                                                                                               |                                  |                                                                                           | Timepoint       | Outcome measure                                               | Value                                        |
|                                                                      |                                                             |                                          | Diabetes 60.0%; Hypertension 92.0%; Hyperlipidaemia 40.0%; CHF 20.0% Cerebrovascular accident 12.0%; PVD 16.0%; CHD/CAD 28.0% | ≥6.0                             | SPL 50.0 mg/day (NR)                                                                      |                 | Frequency - Proportion of patients with HK                    | 12.0%                                        |
| Chen et al. 2019, China (FGCL-4592-806)                              | Phase 3 RCT, multicentre                                    | Chronic HD                               | Diabetes 15.5%                                                                                                                | >5.5                             | Total population (304)                                                                    | At baseline     | Proportion of patients with HK                                | 28%                                          |
|                                                                      |                                                             |                                          |                                                                                                                               | > 5.5 to 6.0                     | HK (52)                                                                                   |                 |                                                               | 17.1%                                        |
|                                                                      |                                                             |                                          |                                                                                                                               | > 6.0 to 6.5                     | HK (19)                                                                                   |                 |                                                               | 6.3%                                         |
|                                                                      |                                                             |                                          |                                                                                                                               | > 6.5                            | HK (14)                                                                                   |                 |                                                               | 4.6%                                         |
| Cho et al. 2008, Korea                                               | Prospective, observational, multicentre                     | Maintenance HD                           | NR                                                                                                                            | >5.5                             | Total population (110)                                                                    | NR              | Prevalence - Proportion of patients with HK                   | 43.5%                                        |
| Cobo Sanchez et al. 2007, Spain                                      | Prospective, observational (cross sectional), single centre | Haemofiltration                          | Diabetes 32.4%; Hypertension 91.0%; Hyperlipidaemia 23.4%; CHD/CAD 11.7%                                                      | ≥5.5                             | Total population (34)                                                                     | NR              | Proportion of patients with HK                                | 29.4%                                        |
| El-Sharkawy et al. 2009, Egypt                                       | Prospective, observational, multicentre                     | Maintenance HD                           | NR                                                                                                                            | NR                               | Total population (354)                                                                    | NR              | Prevalence                                                    | Pre-dialysis – 41.2%<br>Post-dialysis – 6.5% |
| Eron et al. 2018, Europe <sup>†</sup> and USA (NCT02600819)          | Phase 3b single arm, multicentre                            | Chronic HD (HIV-1-infected with ESRD)    | Diabetes 27.0%; Hypertension 95.0%; Hyperlipidaemia 42.0%; Other cardiac disease 47.0%                                        | NR                               | Total population (55); elvitegravir, cobicistat, emtricitabine, and tenofovir alafenamide | 22 months       | Proportion of patients with HK (reported as drug AE)          | 15.0%                                        |
| Farese et al. 2009, Switzerland (NCT00384384)                        | Phase 2 RCT, single centre                                  | Chronic HD                               | NR                                                                                                                            | >6.0                             | PBO (10)                                                                                  | 6 months        | Frequency of severe HK within 358 K <sup>+</sup> measurements | 9.0%                                         |
|                                                                      |                                                             |                                          |                                                                                                                               | >6.0                             | Glycyrrhetic acid (10)                                                                    |                 |                                                               | 0.6%                                         |
| Fishbane et al. 2019, USA (NCT01473420)                              | Phase 3 RCT, multicentre                                    | Maintenance HD                           | NR                                                                                                                            | NR                               | Total population (244); epoetin alfa or epoetin alfa-epbx                                 | 4.6 months      | Proportion of patients with HK (reported as drug AE)          | 1.6%                                         |
| Fishbane et al. 2019b, Japan, Russia, USA, UK (DIALIZE, NCT03303521) | Phase 3b RCT, multicentre                                   | Maintenance HD                           | NR                                                                                                                            | >5.4                             | PBO (99)                                                                                  | 2 weeks         | Proportion of patients with HK (reported as drug AE)          | 6.1%                                         |
|                                                                      |                                                             |                                          |                                                                                                                               | >5.4                             | SZC (97)                                                                                  |                 |                                                               | 2.1%                                         |
| Fishbane et al. 2020, USA (KALM-1)                                   | Phase 3 RCT, multicentre                                    | Chronic HD (moderate-to-severe pruritus) | NR                                                                                                                            | NR                               | PBO (188)                                                                                 | 3 months        | Proportion of patients with HK (reported as drug AE)          | 2.1%                                         |
|                                                                      |                                                             |                                          |                                                                                                                               | NR                               | Difelikefalin (189)                                                                       |                 |                                                               | 2.1%                                         |

| Author, year, country (trial ID)                   | Study design                                 | HD & population specifics       | Co-morbid conditions                                                                                        | S-K <sup>+</sup> levels (mmol/L) | Study subgroups (N)          | Pre-dialysis HK |                                |       |
|----------------------------------------------------|----------------------------------------------|---------------------------------|-------------------------------------------------------------------------------------------------------------|----------------------------------|------------------------------|-----------------|--------------------------------|-------|
|                                                    |                                              |                                 |                                                                                                             |                                  |                              | Timepoint       | Outcome measure                | Value |
| Hammer et al. 2019, Germany (MiREnDa, NCT01691053) | Phase 2 RCT, multicentre                     | Maintenance HD                  | Diabetes 32.0%; Hypertension 78.0%; PVD 20.0%; CHD/CAD 38.0%; Other cardiac disease 64.0%; Arrhythmia 10.0% | ≥6.0                             | SPL (50)                     | 9 months        | Proportion of patients with HK | 90.0% |
|                                                    |                                              |                                 | Diabetes 34.0%; Hypertension 97.9%; PVD 21.3%; CHD/CAD 36.2%; Other cardiac disease 48.8%; Arrhythmia 14.9% | ≥6.0                             | PBO (47)                     |                 |                                | 83.0% |
| Han et al. 2007, Korea                             | Prospective, non-RCT cross-over, multicentre | Maintenance HD                  | NR                                                                                                          | ≥5.6                             | No drug (93)                 | 3 months        | Proportion of patients with HK | 77.4% |
|                                                    |                                              |                                 |                                                                                                             | 5.6-6.0                          | No drug (93)                 |                 |                                | 51.6% |
|                                                    |                                              |                                 |                                                                                                             | >6.0                             | No drug (93)                 |                 |                                | 25.8% |
|                                                    |                                              |                                 |                                                                                                             | ≥5.6                             | ACEI (47)                    |                 |                                | 83.0% |
|                                                    |                                              |                                 |                                                                                                             | 5.6-6.0                          | ACEI (47)                    |                 |                                | 53.1% |
|                                                    |                                              |                                 |                                                                                                             | >6.0                             | ACEI (47)                    |                 |                                | 29.8% |
|                                                    |                                              |                                 |                                                                                                             | ≥5.6                             | ARB (46)                     |                 |                                | 65.2% |
|                                                    |                                              |                                 |                                                                                                             | 5.6-6.0                          | ARB (46)                     |                 |                                | 45.7% |
|                                                    |                                              |                                 |                                                                                                             | >6.0                             | ARB (46)                     |                 |                                | 19.6% |
|                                                    |                                              |                                 |                                                                                                             | ≥5.6                             | ACEI or ARB (93)             |                 |                                | 74.2% |
|                                                    |                                              |                                 |                                                                                                             | 5.6-6.0                          | ACEI or ARB (93)             |                 |                                | 49.5% |
|                                                    |                                              |                                 |                                                                                                             | >6.0                             | ACEI or ARB (93)             |                 |                                | 24.7% |
|                                                    |                                              |                                 |                                                                                                             | ≥5.6                             | ACEI and ARB (62)            |                 |                                | 56.5% |
|                                                    |                                              |                                 |                                                                                                             | 5.6-6.0                          | ACEI and ARB (62)            |                 |                                | 38.7% |
| ≥6.0                                               | ACEI and ARB (62)                            | 17.7%                           |                                                                                                             |                                  |                              |                 |                                |       |
| He et al. 2018, China                              | Prospective, observational, multicentre      | Chronic HD (acute HCV-infected) | NR                                                                                                          | NR                               | Total population (33)        | 3 months        | Proportion of patients with HK | 30.3% |
| Hooker et al. 2015, USA                            | Retrospective, observational, multicentre    | NR                              | NR                                                                                                          | >5.3                             | Total population (55)        | NR              | Proportion of patients with HK | 62.0% |
|                                                    |                                              |                                 |                                                                                                             | ≥6.0                             | Severe HK (NR)               |                 |                                | 55.0% |
| Huang et al. 2015, Taiwan                          | Retrospective, observational (cohort)        | Maintenance HD                  | Diabetes 33.7%; CHD/CAD 12.5%<br>Arrhythmia 5.1%                                                            | >5.0                             | Total population (312)       | NR              | Proportion of patients with HK | 33.3% |
| Hussain et al. 2003, USA                           | Prospective, observational, single centre    | Chronic HD                      | Arrhythmia 6.1%                                                                                             | ≥5.5                             | Total population + SPL (312) | 1 month         | Proportion of patients with HK | 35.7% |
|                                                    |                                              |                                 |                                                                                                             | 5.5-6.0                          | Moderate HK + SPL (15)       |                 |                                | 30.8% |
|                                                    |                                              |                                 |                                                                                                             | >6.0                             | Severe HK + SPL (15)         |                 |                                | 7.1%  |
| Hwang et al. 2011, Taiwan                          | Retrospective, observational, single centre  | Chronic HD                      | Diabetes 41.0%; CHF 8.0%; Cerebrovascular accident 8.0%; PVD 12.0%; CHD/CAD 20.0%                           | >5.5                             | Total population (423)       | 54 months       | Proportion of patients with HK | 12.1% |
| Jebali et al. 2020, Tunisia                        | Observational (cross-                        | Maintenance HD                  | Diabetes 24.4%; Hypertension 80.3%                                                                          | ≥5.5                             | Total population (66)        | NR              | Proportion of patients with HK | 28.8  |

| Author, year, country (trial ID)                         | Study design                                     | HD & population specifics | Co-morbid conditions                                                                                                                | S-K <sup>+</sup> levels (mmol/L) | Study subgroups (N)                             | Pre-dialysis HK |                                |              |
|----------------------------------------------------------|--------------------------------------------------|---------------------------|-------------------------------------------------------------------------------------------------------------------------------------|----------------------------------|-------------------------------------------------|-----------------|--------------------------------|--------------|
|                                                          |                                                  |                           |                                                                                                                                     |                                  |                                                 | Timepoint       | Outcome measure                | Value        |
|                                                          | sectional), multicentre                          |                           |                                                                                                                                     |                                  |                                                 |                 |                                |              |
| Karaboyas et al. 2018, International** (DOPPS phase 2-5) | Prospective, observational (cohort), multicentre | Maintenance HD            | Diabetes 57.0%; Hypertension 85.0%; CHF 38.0%; Cerebrovascular disease 14.0%; PVD 25.0%; CHD/CAD 45.0%; Other cardiac disease 28.0% | >5.5                             | N. America, short vintage no RAASI (2,845)      | 19.2 months*    | Proportion of patients with HK | 6.0%         |
|                                                          |                                                  |                           | Diabetes 66.0%; Hypertension 92.0%; CHF 37.0%; Cerebrovascular disease 15.0%; PVD 25.0%; CHD/CAD 47.0%; Other cardiac disease 23.0% | >5.5                             | N. America, short vintage RAASI (1538)          |                 |                                | 7.0%         |
|                                                          |                                                  |                           | Diabetes 35.0%; Hypertension 82.0%; CHF 26.0%; Cerebrovascular disease 14.0%; PVD 25.0%; CHD/CAD 38.0%; Other cardiac disease 30.0% | >5.5                             | Europe and A/NZ, short vintage no RAASI (3,288) |                 |                                | 14.0%        |
|                                                          |                                                  |                           | Diabetes 44.0%; Hypertension 91.0%; CHF 25%; Cerebrovascular disease 16.0%; PVD 28.0%; CHD/CAD 41.0%; Other cardiac disease 29.0%   | >5.5                             | Europe and A/NZ, short vintage RAASI (2,245)    |                 |                                | 17.0%        |
|                                                          |                                                  |                           | Diabetes 44.0%; Hypertension 80.0%; CHF 31.0%; Cerebrovascular disease 15.0%; PVD 13.0%; CHD/CAD 27.0%; Other cardiac disease 24.0% | >5.5                             | Japan, short vintage no RAASI (713)             |                 |                                | 7.0%         |
|                                                          |                                                  |                           | Diabetes 57.0%; Hypertension 89.0%; CHF 32.0%; Cerebrovascular disease 11.0%; PVD 11.0%; CHD/CAD 25.0%; Other cardiac disease 20.0% | >5.5                             | Japan, short vintage RAASI (792)                |                 |                                | 10.0%        |
|                                                          |                                                  |                           | Diabetes 54.0%; Hypertension 86.0%; CHF 39.0%; Cerebrovascular disease 17.0%; PVD 27.0%; CHD/CAD 46.0%; Other cardiac disease 30.0% | >5.5                             | N. America, long vintage no RAASI (7,566)       |                 |                                | 12.0%        |
|                                                          |                                                  |                           | Diabetes 61.0%; Hypertension 92.0%; CHF 40.0%; Cerebrovascular disease 16.0%; PVD 28.0%; CHD/CAD 50.0%; Other cardiac disease 28.0% | >5.5                             | N. America, long vintage RAASI (5,451)          |                 |                                | 15.0%        |
|                                                          |                                                  |                           | Diabetes 30.0%; Hypertension 78.0%; CHF 26.0%; Cerebrovascular disease 17.0%; PVD 30.0%; CHD/CAD 41.0%; Other cardiac disease 37.0% | >5.5                             | Europe and A/NZ, long vintage no RAASI (11,118) |                 |                                | 19.2 months* |
|                                                          |                                                  |                           | Diabetes 39.0%; Hypertension 91.0%; CHF 31.0%; Cerebrovascular disease 19.0%; PVD 33.0%; CHD/CAD 46.0%; Other cardiac disease 36.0% | >5.5                             | Europe and A/NZ, long vintage RAASI (5,879)     | 30.0%           |                                |              |
|                                                          |                                                  |                           | Diabetes 29.0%; Hypertension 64.0%; CHF 19.0%; Cerebrovascular disease                                                              | >5.5                             | Japan, long vintage no RAASI (3,986)            | 19.0%           |                                |              |

| Author, year, country (trial ID)                         | Study design                                       | HD & population specifics          | Co-morbid conditions                                                                                                                | S-K <sup>+</sup> levels (mmol/L) | Study subgroups (N)                  | Pre-dialysis HK         |                                                                          |                            |
|----------------------------------------------------------|----------------------------------------------------|------------------------------------|-------------------------------------------------------------------------------------------------------------------------------------|----------------------------------|--------------------------------------|-------------------------|--------------------------------------------------------------------------|----------------------------|
|                                                          |                                                    |                                    |                                                                                                                                     |                                  |                                      | Timepoint               | Outcome measure                                                          | Value                      |
|                                                          |                                                    |                                    | 14.0%; PVD 16.0%; CHD/CAD 32.0%; Other cardiac disease 32.0%                                                                        |                                  |                                      |                         |                                                                          |                            |
|                                                          |                                                    |                                    | Diabetes 42.0%; Hypertension 88.0%; CHF 20.0%; Cerebrovascular disease 14.0%; PVD 16.0%; CHD/CAD 32.0%; Other cardiac disease 27.0% | >5.5                             | Japan, long vintage RAASI (3,124)    |                         |                                                                          | 24.0%                      |
| Karaboyas et al. 2017, International‡ (DOPPS all phases) | Prospective, observational (cohort), multicentre   | Maintenance HD                     | Diabetes 43.0%; Hypertension 84.0%; CHF 33.0%; Cerebrovascular disease 15.0%; PVD 26.0%; CHD/CAD 42.0%; Other cardiac disease 31.0% | >5.0                             | Total population (55,183)            | 16.5 (8.1–25.5) months† | Proportion of patients with HK                                           | 38.0%                      |
|                                                          |                                                    |                                    |                                                                                                                                     | 5.1-5.5                          | Mild HK (10,700)                     |                         |                                                                          | 19.0%                      |
|                                                          |                                                    |                                    |                                                                                                                                     | 5.6-6.0                          | Moderate HK (6,259)                  |                         |                                                                          | 11.0%                      |
|                                                          |                                                    |                                    |                                                                                                                                     | >6.0                             | Severe HK (4,399)                    |                         |                                                                          | 8.0%                       |
| Knoll et al. 2002, Canada                                | Prospective, observational (cohort), single centre | Chronic HD                         | Diabetes 24.0%                                                                                                                      | ≥5.5                             | ACEI (62)                            | 8 months*               | Incidence rate                                                           | 17.0 per 100 person-months |
|                                                          |                                                    |                                    | Diabetes 19.0%                                                                                                                      | ≥5.5                             | Controls (158)                       |                         |                                                                          | 26.0 per 100 person-months |
| Kourtellidou et al. 2016, UK (BicHD; NCT02692378)        | Phase 4 RCT                                        | In-centre HD                       | NR                                                                                                                                  | >6.0                             | Without sodium bicarbonate (16)      | At baseline             | Proportion of patients with HK                                           | 12.1%                      |
|                                                          |                                                    |                                    |                                                                                                                                     | >6.0                             | With sodium bicarbonate (16)         | 3 months                |                                                                          | 4.9%                       |
| Lee et al. 2015, Korea                                   | Retrospective, observational, single centre        | Maintenance HD                     | Hypertension 81.9%; CHF 19.3%                                                                                                       | NR                               | Total population (409)               | NR                      | Proportion of patients with HK                                           | 3.9%                       |
| Megahed et al. 2019, Saudi Arabia                        | Observational, single centre                       | Maintenance HD                     | NR                                                                                                                                  | NR                               | Total population (93)                | NR                      | Proportion of patients with HK                                           | 12.9%                      |
| Movilli et al. 2018, Italy                               | Retrospective, observational, single centre        | Chronic HD (oligo-anuric patients) | Diabetes 18.0%; Other cardiac disease 40.0%                                                                                         | >6.0                             | No ACEI/ARB - mild HK (112)          | At baseline             | Proportion of patients with mild and severe HK before and after ACEi/ARB | 18%                        |
|                                                          |                                                    |                                    |                                                                                                                                     |                                  | No ACEI/ARB - severe HK (112)        |                         |                                                                          | 0.0%                       |
|                                                          |                                                    |                                    |                                                                                                                                     | 5.5-6.0                          | With ACEI/ARB - mild HK (112)        | 3 months                |                                                                          | 52.0%                      |
|                                                          |                                                    |                                    |                                                                                                                                     | >6.0                             | With ACEI/ARB - severe HK (112)      |                         |                                                                          | 19.0%                      |
| Nemati et al. 2010, Iran                                 | Observational (cross-sectional), multicentre       | Maintenance HD                     | Arrhythmia 0.0%                                                                                                                     | >5.2                             | Total population (80)                | NR                      | Prevalence - Proportion of patients with HK                              | 59.0%                      |
| Raza et al. 2004, Saudi Arabia                           | Prospective, single centre                         | Maintenance HD                     | NR                                                                                                                                  | >6.2                             | Before nutritional counselling (110) | NR                      | Proportion of patients with HK                                           | 21.0%                      |
|                                                          |                                                    |                                    |                                                                                                                                     | >6.2                             | After nutritional counselling (110)  |                         |                                                                          | 9.0%                       |

| Author, year, country (trial ID)        | Study design                                       | HD & population specifics | Co-morbid conditions                                                                                                                                      | S-K <sup>+</sup> levels (mmol/L)         | Study subgroups (N)                       | Pre-dialysis HK                             |                                                                        |                                                                        |
|-----------------------------------------|----------------------------------------------------|---------------------------|-----------------------------------------------------------------------------------------------------------------------------------------------------------|------------------------------------------|-------------------------------------------|---------------------------------------------|------------------------------------------------------------------------|------------------------------------------------------------------------|
|                                         |                                                    |                           |                                                                                                                                                           |                                          |                                           | Timepoint                                   | Outcome measure                                                        | Value                                                                  |
| Singh et al. 2017, USA                  | Prospective, observational                         | NR                        | NR                                                                                                                                                        | >5.0                                     | Dialysate K <sup>+</sup> <3.0 mEq/L (179) | 12 days                                     | Proportion of patients with HK after LIDP                              | 50.0%                                                                  |
|                                         |                                                    |                           |                                                                                                                                                           | >5.0                                     | Dialysate K <sup>+</sup> ≥3.0 mEq/L (33)  |                                             |                                                                        | 36.0%                                                                  |
| Thomas et al. 2020, Canada              | Retrospective, observational (cohort), multicentre | Maintenance HD            | Diabetes: 60.9%; Hypertension: 89%; MI: 14.2%; CHF 44.4%; Cerebrovascular accident 6.5%; PVD 17.5%; CHD/CAD: 61.3%; Arrhythmia 20.5%                      | NR                                       | Prevalence cohort-monthly testing (5,335) | 35.8 (14-17.5) <sup>†</sup>                 | Prevalence - Proportion of patients with HK                            | Monthly testing: 7%<br>Every 6 weeks: 6%                               |
|                                         |                                                    |                           |                                                                                                                                                           |                                          |                                           |                                             | Incidence rate                                                         | Monthly testing: 22.6<br>Every 6 weeks: 17.6<br>per 1000 patient years |
|                                         |                                                    |                           | NR                                                                                                                                                        | Incidence cohort-monthly testing (7,752) | 21.1 (7.6-37.2) <sup>†</sup>              | Prevalence - Proportion of patients with HK | Monthly testing: 4%<br>Every 6 weeks: 3%                               |                                                                        |
|                                         |                                                    |                           |                                                                                                                                                           |                                          |                                           | Incidence rate                              | Monthly testing: 21.0<br>Every 6 weeks: 14.3<br>per 1000 patient years |                                                                        |
| Tzamaloukas et al. 1987, USA            | Retrospective, observational, single centre        | Chronic HD                | NR                                                                                                                                                        | >6.0                                     | Non-diabetic patients (136)               | 50.4 (54.0) months*                         | Proportion of patients with HK                                         | 10.0%                                                                  |
|                                         |                                                    |                           |                                                                                                                                                           | >6.0                                     | Diabetic patients (36)                    |                                             |                                                                        | 26.4 (20.4) months *                                                   |
| Vaz de Melo Ribeiro et al. 2020, Brazil | Prospective, single centre                         | NR                        | NR                                                                                                                                                        | NR                                       | Prior to nutritional intervention         | At baseline                                 | Proportion of patients with HK                                         | 56.6%                                                                  |
|                                         |                                                    |                           |                                                                                                                                                           |                                          | After the nutritional intervention        | 4 months                                    |                                                                        | 28.9%                                                                  |
| Vukusich et al. 2010, Chile             | RCT                                                | Chronic HD                | Cerebrovascular accident 8.7%                                                                                                                             | NR                                       | PBO (23)                                  | 24 months*                                  | Proportion of patients with HK                                         | 0.0%                                                                   |
|                                         |                                                    |                           | Cerebrovascular accident 10.0%                                                                                                                            | NR                                       | SPL (30)                                  |                                             |                                                                        | 0.0%                                                                   |
| Walsh et al. 2015, Canada (PHASE)       | RCT, multicentre                                   | NR                        | Diabetes 51.9%; CHF 10.4%; Cerebrovascular accident: 5.2%; PVD 6.5%; CHD/CAD 20.8%                                                                        | >6.0                                     | Eplerenone (75)                           | 3 months                                    | Proportion of patients with HK                                         | 24.7%                                                                  |
|                                         |                                                    |                           | Diabetes 51.9%; CHF 7.8%; Cerebrovascular accident: 5.2%; PVD 11.7%; CHD/CAD 16.9%                                                                        | >6.0                                     | PBO (71)                                  |                                             |                                                                        | 18.2%                                                                  |
|                                         |                                                    |                           | NR                                                                                                                                                        | >6.5                                     | Eplerenone (NR)                           |                                             |                                                                        | 11.7%                                                                  |
|                                         |                                                    |                           | NR                                                                                                                                                        | >6.5                                     | PBO (NR)                                  |                                             |                                                                        | 2.6%                                                                   |
| Woods et al. 2019, Australia            | Prospective                                        | HD patients with BMIs >30 | Diabetes 45.5%                                                                                                                                            | >6.0                                     | Total population (22)                     | 3 months                                    | Proportion of patients with HK                                         | 54.5%                                                                  |
| Yusuf et al. 2016, USA (USRDS)          | Retrospective, observational (cohort), multicentre | Maintenance HD            | Diabetes: 57.9%; Atherosclerotic heart disease 31.0%; CHF 38.1%; Cerebrovascular accident 12.2%; PVD 21.9%; Other cardiac disease 11.6%; Arrhythmia 14.9% | ≥5.5                                     | 2007 cohort (28,774)                      | 9 months* (135,354 months <sup>§§</sup> )   | Incidence rate                                                         | 16.7 per 100 person-months                                             |

| Author, year, country (trial ID)                                         | Study design                                                | HD & population specifics          | Co-morbid conditions                                                                                                                                      | S-K <sup>+</sup> levels (mmol/L) | Study subgroups (N)                  | Pre-dialysis HK |                                                      |                            |
|--------------------------------------------------------------------------|-------------------------------------------------------------|------------------------------------|-----------------------------------------------------------------------------------------------------------------------------------------------------------|----------------------------------|--------------------------------------|-----------------|------------------------------------------------------|----------------------------|
|                                                                          |                                                             |                                    |                                                                                                                                                           |                                  |                                      | Timepoint       | Outcome measure                                      | Value                      |
|                                                                          |                                                             |                                    | Diabetes: 59.0%; Atherosclerotic heart disease 31.3%; CHF 39.1%; Cerebrovascular accident 11.9%; PVD 22.1%; Other cardiac disease 13.1%; Arrhythmia 15.0% | ≥5.5                             | 2008 cohort (34,788)                 |                 |                                                      | 16.8 per 100 person-months |
|                                                                          |                                                             |                                    | Diabetes: 59.9%; Atherosclerotic heart disease 31.5%; CHF 38.7%; Cerebrovascular accident 12.1%; PVD 22.4%; Other cardiac disease 14.3%; Arrhythmia 14.7% | ≥5.5                             | 2009 cohort (34,571)                 |                 |                                                      | 16.5 per 100 person-months |
|                                                                          |                                                             |                                    | Diabetes: 60.3%; Atherosclerotic heart disease 30.4%; CHF 38.0%; Cerebrovascular accident 12.3%; PVD 22.1%; Other cardiac disease 14.6%; Arrhythmia 14.6% | ≥5.5                             | 2010 cohort (36,888)                 |                 |                                                      | 16.3 per 100 person-months |
| <b>CKD population (n = 21)</b>                                           |                                                             |                                    |                                                                                                                                                           |                                  |                                      |                 |                                                      |                            |
| Acha et al. 2020, Cameroon                                               | Prospective, observational (cross-sectional), single centre | Maintenance HD                     | Diabetes 14.7%                                                                                                                                            | ≥5.5                             | Total population (95)                | 4 months        | Prevalence - Proportion of patients with HK          | 33.7%                      |
| Belmar et al. 2019, Spain                                                | Retrospective, observational, single centre                 | NR                                 | Diabetes 31.7%; CHF 5.0%; Cerebrovascular accident 5.0%; CHD/CAD 13.9%                                                                                    | >5.5                             | Total population (1097)              | 3.2 months*     | Prevalence - Proportion of patients with HK          | 16.4%                      |
|                                                                          |                                                             |                                    |                                                                                                                                                           | 5.5-5.9                          | Mild HK                              |                 |                                                      | 8.7%                       |
|                                                                          |                                                             |                                    |                                                                                                                                                           | 6.0-6.4                          | Moderate HK                          |                 |                                                      | 4.4%                       |
|                                                                          |                                                             |                                    |                                                                                                                                                           | 6.5-6.9                          | Severe                               |                 |                                                      | 2.0%                       |
|                                                                          |                                                             |                                    |                                                                                                                                                           | ≥7.0                             | Very severe                          |                 |                                                      | 1.4%                       |
| Block et al. 2019, International <sup>§</sup> (NCT01785849, NCT01788046) | Phase 3 RCTs, multicentre                                   | With secondary hyperparathyroidism | NR                                                                                                                                                        | NR                               | PBO – all HK (503)                   | 6 months        | Proportion of patients with HK (reported as drug AE) | 2.1%                       |
|                                                                          |                                                             |                                    |                                                                                                                                                           | NR                               | Etelcalcetide – all HK (513)         |                 |                                                      | 4.4%                       |
|                                                                          |                                                             |                                    |                                                                                                                                                           | NR                               | PBO – severe HK                      |                 |                                                      | 0.4%                       |
|                                                                          |                                                             |                                    |                                                                                                                                                           | NR                               | Etelcalcetide – severe HK            |                 |                                                      | 2%                         |
| Checherita et al. 2011, Romania                                          | Non-RCT, single centre                                      | NR                                 | NR                                                                                                                                                        | >5.0                             | Total population (202)               | 24 months       | Proportion of patients with HK                       | 57.9%                      |
| de Almeida et al. 2018, Brazil                                           | Observational (cross-sectional), single centre              | NR                                 | NR                                                                                                                                                        | >6.0                             | With residual renal function (27)    | NR              | Proportion of patients with HK                       | 36.8%                      |
|                                                                          |                                                             |                                    |                                                                                                                                                           | >6.0                             | Without residual renal function (24) |                 |                                                      | 82.7%                      |
| Frazão et al. 2014, Brazil                                               | Observational (cross-sectional), single centre              | NR                                 | NR                                                                                                                                                        | NR                               | Total population (330)               | NR              | Proportion of patients with HK                       | 64.6%                      |



| Author, year, country (trial ID)                 | Study design                                       | HD & population specifics | Co-morbid conditions                                                                                            | S-K <sup>+</sup> levels (mmol/L) | Study subgroups (N)                   | Pre-dialysis HK         |                                                      |       |
|--------------------------------------------------|----------------------------------------------------|---------------------------|-----------------------------------------------------------------------------------------------------------------|----------------------------------|---------------------------------------|-------------------------|------------------------------------------------------|-------|
|                                                  |                                                    |                           |                                                                                                                 |                                  |                                       | Timepoint               | Outcome measure                                      | Value |
| Garagarza et al. 2015, Portugal                  | Observational (longitudinal cohort), multicentre   | Maintenance HD            | Diabetes 34.4%                                                                                                  | >5.5                             | Without nutritional counselling (660) | At baseline             | Proportion of patients with HK                       | 52.0% |
|                                                  |                                                    |                           |                                                                                                                 | >5.5                             | With nutritional counselling (660)    | 6 months                |                                                      | 35.8% |
| Genovesi et al. 2009, Italy                      | Retrospective, observational, multicentre          | Chronic HD                | Diabetes 19.1%; Hypertension 81.3%; CHD/CAD 23.5%; Arrhythmia 26.7%                                             | ≥6.0                             | Total population (476)                | 36 months               | Proportion of patients with HK                       | 31.3% |
| Iseki et al. 2013, Japan (OCTOPUS; CRG010600030) | RCT, multicentre                                   | Chronic HD                | Diabetes 32.0%; MI 3.0%; Cerebrovascular accident 15.0%                                                         | NR                               | Control (234)                         | 42 months               | Proportion of patients with HK (reported as drug AE) | 0.9%  |
|                                                  |                                                    |                           | Diabetes 32.0%; MI 6.0%; Cerebrovascular accident 15.0%                                                         | NR                               | ARB Olmesartan (235)                  |                         |                                                      | 0.9%  |
| Kim et al. 2017, USA (DaVita)                    | Observational (cohort), multicentre                | NR                        | Diabetes 58.0%; Hypertension 61.0%; Atherosclerotic heart disease 13.0%; CHF 36.0%; Other cardiac disease 13.0% | 5.0-5.5                          | Af-Am patients (2,384)                | 60 months               | Proportion of patients with HK                       | 6.9%  |
|                                                  |                                                    |                           |                                                                                                                 | >5.0                             | Af-Am patients (34,574)               |                         |                                                      | 5.5%  |
|                                                  |                                                    |                           |                                                                                                                 | >5.5                             | Af-Am patients (509)                  |                         |                                                      | 1.5%  |
|                                                  |                                                    |                           | Diabetes 55.0%; Hypertension 48.0%; Atherosclerotic heart disease 17.0%; CHF 37.0%; Other cardiac disease 18.0% | 5.0-5.5                          | White patients (5,228)                |                         |                                                      | 10.2% |
|                                                  |                                                    |                           |                                                                                                                 | >5.0                             | White patients (51,297)               |                         |                                                      | 12.5% |
|                                                  |                                                    |                           |                                                                                                                 | >5.5                             | White patients (1204)                 |                         |                                                      | 2.3%  |
|                                                  |                                                    |                           | Diabetes 68.0%; Hypertension 45.0%; Atherosclerotic heart disease 12.0%; CHF 38.0%; Other cardiac disease 12.0% | 5.0-5.5                          | Hispanic patients (2,572)             |                         |                                                      | 15.7% |
|                                                  |                                                    |                           |                                                                                                                 | >5.0                             | Hispanic patients (16,370)            |                         |                                                      | 21.2% |
|                                                  |                                                    |                           |                                                                                                                 | >5.5                             | Hispanic patients (902)               |                         |                                                      | 5.5%  |
|                                                  |                                                    |                           |                                                                                                                 |                                  |                                       |                         |                                                      |       |
| Kovesdy et al. 2007, USA (DaVita)                | Observational (cohort), multicentre                | Maintenance HD            | NR                                                                                                              | ≥5.0                             | Total population (74,219)             | NR                      | Proportion of patients with HK                       | 39.5% |
|                                                  |                                                    |                           |                                                                                                                 | 5.0-5.9                          | Mild HK                               |                         |                                                      | 35%   |
|                                                  |                                                    |                           |                                                                                                                 | >6.0                             | Severe HK                             |                         |                                                      | 4.5%  |
| Kovesdy et al. 2019b, USA (DaVita)               | Retrospective, observational (cohort), multicentre | Chronic HD                | Diabetes 69.0%; MI 8.0%; CHF 15.0%; PVD 10.0%; Arrhythmia 2.0%                                                  | ≥6.0                             | Pre - PAT (527)                       | 4.6 months <sup>†</sup> | Proportion of patients with HK                       | 48%   |
|                                                  |                                                    |                           |                                                                                                                 | ≥6.0                             | Post - PAT (392)                      |                         |                                                      | 22%   |
| Lin et al. 2009, China                           | Observational (cross-sectional), single centre     | Chronic HD                | Diabetes 41.5%                                                                                                  | ≥5.3                             | Total population (200)                | NR                      | Proportion of patients with HK                       | 35.0% |
| Mattos et al. 2012, Brazil                       | NR                                                 | NR                        | Diabetes 50.0%; Hypertension 100.0%                                                                             | NR                               | Total population (49)                 | 6 months                | Proportion of patients with HK                       | 43.0% |

| Author, year, country (trial ID)         | Study design                                 | HD & population specifics          | Co-morbid conditions                                                      | S-K <sup>+</sup> levels (mmol/L) | Study subgroups (N)     | Pre-dialysis HK |                                                     |       |
|------------------------------------------|----------------------------------------------|------------------------------------|---------------------------------------------------------------------------|----------------------------------|-------------------------|-----------------|-----------------------------------------------------|-------|
|                                          |                                              |                                    |                                                                           |                                  |                         | Timepoint       | Outcome measure                                     | Value |
| Patil et al. 2015, India                 | Retrospective, observational, single centre  | CKD stages 2-5 requiring HD        | Diabetes 27.5%; Hypertension 45.5%                                        | NR                               | Total population (51)   | NR              | Proportion of patients with HK                      | 25.5% |
| Poulikakos et al. 2012, UK               | Prospective                                  | Maintenance HD                     | NR                                                                        | >6.0                             | Controls (77)           | NR              | Proportion of patients with HK                      | 5.0%  |
|                                          |                                              |                                    |                                                                           | >6.0                             | With Beta-blockers (77) |                 |                                                     | 6.0%  |
| Pourfarziani et al. 2008, Iran           | Observational (cross-sectional), multicentre | NR                                 | NR                                                                        | NR                               | Total population (338)  | NR              | Proportion of patients with HK                      | 58.0% |
| Robertson et al. 2009, USA (DaVita)      | Observational (cohort), multicentre          | NR                                 | NR                                                                        | >5.5                             | Total population (NR)   | 12 months       | Proportion of patients with HK >3 months            | 23.0% |
| Ross et al. 2015, USA                    | Prospective, observational, single centre    | Outpatient                         | Diabetes 85.0%                                                            | ≥5.7                             | Total population (167)  | NR              | Proportion of patients with HK                      | 14.4% |
|                                          |                                              |                                    |                                                                           | 5.7-6.3                          | Moderate HK (167)       |                 |                                                     | 9.5%  |
|                                          |                                              |                                    |                                                                           | >6.3                             | Severe HK (167)         |                 |                                                     | 4.8%  |
| Taheri et al. 2009, Iran (RALES)         | RCT, single centre                           | Chronic HD (with heart failure)    | Diabetes 62.5%; Hypertension 75.0%; Hyperlipidaemia 30.5%; CHD/CAD 62.5%  | >5.5                             | SPL (5)                 | 6 months        | Proportion of patients with HK                      | 0.0%  |
|                                          |                                              |                                    | Diabetes 62.5%; Hypertension 100.0%; Hyperlipidaemia 25.0%; CHD/CAD 50.0% | >5.5                             | PBO (6)                 |                 |                                                     | 16.7% |
| Yang et al. 2019, China                  | Retrospective, observational, single centre  | Maintenance HD                     | NR                                                                        | ≥5.5                             | Total population (204)  | NR              | Proportion of patients with HK                      | 36.3% |
| <b>AKI population (n = 4)</b>            |                                              |                                    |                                                                           |                                  |                         |                 |                                                     |       |
| Brown et al. 2019, South Africa          | Retrospective, observational, single centre  | HD in ICU                          | NR                                                                        | NR                               | Total population (76)   | NR              | Patients with HK as indication for initiation of HD | 5.3%  |
| Douvrin et al. 2018, Canada              | Retrospective, observational, single centre  | Intermittent HD while hospitalized | Diabetes 59.0%; Hypertension 68.0%; CHF 41.0%; PVD 16.0%                  | ≥5.5                             | Total population (80)   | 12-month period | Patients with HK as indication for initiation of HD | 35.0% |
|                                          |                                              |                                    |                                                                           | ≥6.0                             |                         |                 |                                                     |       |
| Maoujoud et al. 2014, Morocco            | Retrospective, observational, single centre  | Intermittent HD in ICU             | Diabetes 44.0%; Hypertension 33.4%                                        | 7.3 (0.7)*                       | Total population (105)  | 60-month period | Patients with HK as indication for initiation of HD | 48.5% |
| Nyandwi et al. 2020, Burundi             | Retrospective, observational, multicentre    | HD in ICU                          | NR                                                                        | severe                           | Total population (46)   | NR              | Patients with HK as indication for initiation of HD | 19.6% |
| <b>HK as a medical emergency (n = 5)</b> |                                              |                                    |                                                                           |                                  |                         |                 |                                                     |       |
| Ahmad et al. 2010, Saudi Arabia          | Prospective, observational, single centre    | Emergency HD                       | NR                                                                        | >5.5                             | Total population (192)  | At baseline     | Proportion of patients with HK                      | 11.5% |

| Author, year, country (trial ID) | Study design                                   | HD & population specifics | Co-morbid conditions               | S-K <sup>+</sup> levels (mmol/L) | Study subgroups (N)      | Pre-dialysis HK |                                                     |       |
|----------------------------------|------------------------------------------------|---------------------------|------------------------------------|----------------------------------|--------------------------|-----------------|-----------------------------------------------------|-------|
|                                  |                                                |                           |                                    |                                  |                          | Timepoint       | Outcome measure                                     | Value |
| Rafique et al. 2020, UK          | Observational, single centre                   | Emergency HD              | NR                                 | ≥5.5                             | Total population (66)    | NR              | Proportion of patients with HK                      | 59%   |
|                                  |                                                |                           |                                    | 5.5-6.4                          | Moderate HK (19)         |                 |                                                     | 29%   |
|                                  |                                                |                           |                                    | >6.5                             | Severe HK (20)           |                 |                                                     | 30%   |
| Sacchetti et al. 1999, USA       | Retrospective, observational, single centre    | Emergency HD              | CHF 65.0%                          | NR                               | Total population (37)    | NR              | Proportion of patients with HK                      | 24.0% |
| Triqui et al. 2020, Tunisia      | Observational (cross-sectional), single centre | Emergency HD              | Diabetes 45.0%; Hypertension 58.0% | NR                               | Total population (117)   | NR              | Patients with HK as indication for initiation of HD | 37.6  |
| Yalin et al. 2012, Turkey        | Retrospective, observational                   | Emergency HD              | Diabetes 24.7%; Hypertension 36.2% | NR                               | Surviving patients (489) | NR              | Proportion of patients with HK                      | 21.1% |

A/NZ: Australia/New Zealand; ACEI: angiotensin-converting-enzyme inhibitor; Af-Am: African-American; AKI: acute kidney injury; ARB: angiotensin II receptor blockers; CAD: coronary artery disease; CHD: coronary heart disease; CHF: congestive heart failure; CKD: chronic kidney disease; ESRD: end-stage renal disease; HCV: hepatitis C virus; HD: haemodialysis; HIV-1: human immunodeficiency virus 1; HK: hyperkalaemia; ICU: intensive care unit; LIPD: long interdialytic period; MI: myocardial infarction; NR: not reported; PAT: patiomer; PBO: placebo; PVD: peripheral vascular disease; RAASI: renin-angiotensin-aldosterone system inhibitors; RCT: randomised controlled trial; S-K<sup>+</sup>: serum potassium; SPL: spironolactone; SPS: sodium polystyrene sulphonate

\* mean (SD)

† median (IQR)

§ Australia, Austria, Belgium, Canada, the Czech Republic, Denmark, Estonia, France, Germany, Greece, Hungary, Israel, Italy, Latvia, Lithuania, New Zealand, Poland, Portugal, the Russian Federation, Spain, Sweden, Switzerland, Turkey and USA

¶ Austria, France, Germany and USA

\*\* North America (Canada, USA), Europe/ANZ (Belgium, France, Germany, Italy, Spain, Sweden, United Kingdom, Australia, New Zealand) and Japan

‡ France, Germany, Italy, Japan, Spain, United Kingdom, & USA in phases 1 to 5; Australia and New Zealand, Belgium, Canada, and Sweden in phases 2 to 5; and the Gulf Cooperation Council (including Bahrain, Kuwait, Oman, Qatar, Saudi Arabia and United Arab Emirates), China, Russia, and Turkey in phase 5

§§ cumulative follow-up time

**Table S3.** Summary of baseline characteristics and main outcomes of identified studies (n=25) reporting mortality outcomes associated with HK

| Author, year, country (trial ID)                | Study design                                | Population                                                                    | Co-morbid conditions                                                                                                    | S-K <sup>+</sup> levels (mmol/L) | Subgroup population (N)    | Deaths due to HK (%) | All-cause mortality |                               | CV- mortality |       | CV events |
|-------------------------------------------------|---------------------------------------------|-------------------------------------------------------------------------------|-------------------------------------------------------------------------------------------------------------------------|----------------------------------|----------------------------|----------------------|---------------------|-------------------------------|---------------|-------|-----------|
|                                                 |                                             |                                                                               |                                                                                                                         |                                  |                            |                      | Timepoint           | Value                         | Timepoint     | Value |           |
| Alagusundaramoorthy et al. 2018, USA            | Retrospective, observational, single centre | ESRD on HD                                                                    | NR                                                                                                                      | 7.0                              | Severe HK (346)            | NR                   | NR                  | 6.9%                          | NR            | NR    | NR        |
| Balle et al. 1990, Germany                      | Retrospective, observational, single centre | End-stage renal failure due to analgesic-associated nephropathy on regular HD | Hypertension 44.0%; MI 4.0%; Hyperlipidaemia 62%; CHF 9.0%; CHD/CAD 29.0%; Other cardiac disease 62.0%; Arrhythmia 9.0% | NR                               | Total population (55)      | 7.3                  | NR                  | NR                            | NR            | NR    | NR        |
| Chaaban et al. 2013, United Arab Emirates       | Retrospective, observational (case-control) | CKD on HD                                                                     | Diabetes 46.0%                                                                                                          | NR                               | Calcium resonium – A (28)  | 0                    | NR                  | NR                            | NR            | NR    | NR        |
|                                                 |                                             |                                                                               | Diabetes 57.5%                                                                                                          | NR                               | Calcium resonium – NA (42) | 0                    | NR                  | NR                            | NR            | NR    | NR        |
|                                                 |                                             |                                                                               | Diabetes 47.0%                                                                                                          | NR                               | Controls (30)              | 0                    | NR                  | NR                            | NR            | NR    | NR        |
| Chan et al. 2011, USA                           | Retrospective, observational, multicentre   | ESRD on chronic HD                                                            | Diabetes 50.9%; MI or CAD 18.1%; CHF 25.1%; Cerebrovascular accident 5.0%; PVD 17.4%                                    | ≥6.5                             | ARB (5,828)                | NR                   | 2 years             | HR (95% CI): 0.97 (0.92-1.01) | NR            | NR    | NR        |
|                                                 |                                             |                                                                               | Diabetes 53.2%; MI or CAD 20.0%; CHF 27.7%; Cerebrovascular accident 6.2%; PVD 18.4%                                    | ≥6.5                             | ACEI (22,800)              | NR                   | 2 years             | HR (95% CI): 1.0              | NR            | NR    | NR        |
| Charytan et al. 2017, USA (Spin-D; NCT02285920) | Phase 2 RCT, multicentre                    | ESRD on maintenance HD                                                        | NR                                                                                                                      | >6.0                             | PBO (51)                   | 0                    | NR                  | NR                            | NR            | NR    | NR        |
|                                                 |                                             |                                                                               |                                                                                                                         | >6.0                             | SPL 12.5 mg/day (27)       | 0                    | NR                  | NR                            | NR            | NR    | NR        |
|                                                 |                                             |                                                                               |                                                                                                                         | >6.0                             | SPL 25.0 mg/day (26)       | 0                    | NR                  | NR                            | NR            | NR    | NR        |
|                                                 |                                             |                                                                               |                                                                                                                         | >6.0                             | SPL 50.0 mg/day (25)       | 0                    | NR                  | NR                            | NR            | NR    | NR        |

| Author, year, country (trial ID)             | Study design                                     | Population        | Co-morbid conditions                                                               | S-K <sup>+</sup> levels (mmol/L) | Subgroup population (N)                  | Deaths due to HK (%) | All-cause mortality    |                               | CV- mortality        |                             | CV events |
|----------------------------------------------|--------------------------------------------------|-------------------|------------------------------------------------------------------------------------|----------------------------------|------------------------------------------|----------------------|------------------------|-------------------------------|----------------------|-----------------------------|-----------|
|                                              |                                                  |                   |                                                                                    |                                  |                                          |                      | Timepoint              | Value                         | Timepoint            | Value                       |           |
| Chatoth et al. 2018, USA                     | Retrospective, observational, multicentre        | ESRD on HD        | NR                                                                                 | >6.0                             | No K <sup>+</sup> binder (NR)            | NR                   | 6 months               | 2.5%                          | NR                   | NR                          | NR        |
|                                              |                                                  |                   |                                                                                    | >5.5                             | No K <sup>+</sup> binder (26400)         | NR                   | 6 months               | 2.3%                          | NR                   | NR                          | NR        |
|                                              |                                                  |                   |                                                                                    | >6.0                             | PAT (NR)                                 | NR                   | 6 months               | 0.0%                          | NR                   | NR                          | NR        |
|                                              |                                                  |                   |                                                                                    | >5.5                             | PAT (106)                                | NR                   | 6 months               | 2.8%                          | NR                   | NR                          | NR        |
|                                              |                                                  |                   |                                                                                    | >6.0                             | SPS (NR)                                 | NR                   | 6 months               | 1.8%                          | NR                   | NR                          | NR        |
|                                              |                                                  |                   |                                                                                    | >5.5                             | SPS (649)                                | NR                   | 6 months               | 2.5%                          | NR                   | NR                          | NR        |
| Ferre et al. 2018, USA (MADRAD, NCT01415570) | Prospective, observational (cohort), multicentre | CKD on HD         | Diabetes 50.0%; CHF 13.0%; Cerebrovascular accident 2.0%; CHD/CAD 13.0%; CVD 23.0% | ≥5.0                             | Dialysate K <sup>+</sup> 1.0 mEq/L (47)  | NR                   | 3.2 years <sup>¶</sup> | HR (95% CI): 2.74 (1.39-5.40) | NR                   | NR                          | NR        |
|                                              |                                                  |                   |                                                                                    | <5.0                             | Dialysate K <sup>+</sup> 1.0 mEq/L (47)  | NR                   | 3.2 years <sup>¶</sup> | HR (95% CI): 0.76 (0.27-2.14) | NR                   | NR                          | NR        |
|                                              |                                                  |                   |                                                                                    | ≥5.0                             | Dialysate K <sup>+</sup> 2.0 mEq/L (449) | NR                   | 3.2 years <sup>¶</sup> | HR (95% CI): 1.0              | NR                   | NR                          | NR        |
|                                              |                                                  |                   |                                                                                    | <5.0                             | Dialysate K <sup>+</sup> 2.0 mEq/L (449) | NR                   | 3.2 years <sup>¶</sup> | HR (95% CI): 1.0              | NR                   | NR                          | NR        |
|                                              |                                                  |                   |                                                                                    | ≥5.0                             | Dialysate K <sup>+</sup> 3.0 mEq/L (128) | NR                   | 3.2 years <sup>¶</sup> | HR (95% CI): 0.75 (0.33-1.69) | NR                   | NR                          | NR        |
|                                              |                                                  |                   |                                                                                    | <5.0                             | Dialysate K <sup>+</sup> 3.0 mEq/L (128) | NR                   | 3.2 years <sup>¶</sup> | HR (95% CI): 0.95 (0.59-1.52) | NR                   | NR                          | NR        |
| Genovesi et al. 2009, Italy                  | Retrospective, observational, multicentre        | CKD on chronic HD | Diabetes 19.1%; Hypertension 81.3%; CHD/CAD 23.5%; Arrhythmia 26.7%                | ≥6.0                             | With HK (149)                            | NR                   | 3 years <sup>§</sup>   | cumulative incidence: 40.7%   | 3 years <sup>§</sup> | cumulative incidence: 18.2% | NR        |
|                                              |                                                  |                   |                                                                                    |                                  |                                          |                      |                        | HR (95% CI): 2.74 (1.28-5.85) |                      |                             |           |
|                                              |                                                  |                   |                                                                                    | <6.0                             | Without HK (327)                         | NR                   | 3 years <sup>§</sup>   | cumulative incidence: 31.9%   | 3 years <sup>§</sup> | cumulative incidence: 12.6% | NR        |
|                                              |                                                  |                   |                                                                                    |                                  |                                          |                      | HR (95% CI): 1.0       |                               |                      |                             |           |

| Author, year, country (trial ID)              | Study design                                     | Population             | Co-morbid conditions                                                                                                                | S-K <sup>+</sup> levels (mmol/L) | Subgroup population (N)   | Deaths due to HK (%) | All-cause mortality    |                               | CV- mortality          |       | CV events                     |
|-----------------------------------------------|--------------------------------------------------|------------------------|-------------------------------------------------------------------------------------------------------------------------------------|----------------------------------|---------------------------|----------------------|------------------------|-------------------------------|------------------------|-------|-------------------------------|
|                                               |                                                  |                        |                                                                                                                                     |                                  |                           |                      | Timepoint              | Value                         | Timepoint              | Value |                               |
| Hwang et al. 2011, Taiwan                     | Retrospective, observational, single centre      | ESRD on chronic HD     | Diabetes 41.0%; CHF 8.0%; Cerebrovascular accident 8.0%; PVD 12.0%; CHD/CAD 20.0%                                                   | >5.5                             | With HK (51)              | NR                   | 4.5 years <sup>§</sup> | 21.6%                         | 4.5 years <sup>§</sup> | 9.8%  | Cardiac arrest 3.9%; CAD 5.9% |
|                                               |                                                  |                        | Diabetes 38.0%; CHF 2.0%; Cerebrovascular accident 11.0%; PVD 6.0%; CHD/CAD 17.0%                                                   | 5.5-3.5                          | Without HK (326)          | NR                   | 4.5 years <sup>§</sup> | 18.7%                         | 4.5 years <sup>§</sup> | 5.5%  | Cardiac arrest 1.8%; CAD 1.8% |
|                                               |                                                  |                        | Diabetes 52.0%; CHF 7.0%; Cerebrovascular accident 20.0%; PVD 9.0%; CHD/CAD 28.0%                                                   | <3.5                             | With hypokalaemia (46)    | NR                   | 4.5 years <sup>§</sup> | 39.1%                         | 4.5 years <sup>§</sup> | 17.3% | Cardiac arrest 6.5%; CAD 6.5% |
| Jadoul et al. 2012, International* (DOPPS)    | Prospective, observational (cohort), multicentre | ESRD on maintenance HD | NR                                                                                                                                  | >5.0                             | Total population (37,765) | 1.3                  | NR                     | NR                            | NR                     | NR    | NR                            |
| Karaboyas et al. 2017, International† (DOPPS) | Prospective, observational (cohort), multicentre | ESRD on maintenance HD | Diabetes 43.0%; Hypertension 84.0%; CHF 33.0%; Cerebrovascular disease 15.0%; PVD 26.0%; CHD/CAD 42.0%; Other cardiac disease 31.0% | 5.1-5.5                          | Mild HK (10,700)          | NR                   | 1.4 years**            | HR (95% CI): 1.02 (0.97-1.07) | NR                     | NR    | Cardiac arrhythmia (HR: 1.0)  |
|                                               |                                                  |                        |                                                                                                                                     | 5.6-6.0                          | Moderate HK (6,259)       | NR                   | 1.4 years**            | HR (95% CI): 1.13 (1.06-1.20) | NR                     | NR    | Cardiac arrhythmia (HR: 1.07) |
|                                               |                                                  |                        |                                                                                                                                     | >6.0                             | Severe HK (4,399)         | NR                   | 1.4 years**            | HR (95% CI): 1.12 (1.04-1.21) | NR                     | NR    | Cardiac arrhythmia (HR: 1.21) |
|                                               |                                                  |                        |                                                                                                                                     | 4.0-5.0                          | Without HK (27,525)       | NR                   | 1.4 years**            | HR (95% CI): 1.0              | NR                     | NR    | Cardiac arrhythmia (HR: 1.0)  |
|                                               |                                                  |                        |                                                                                                                                     | <4.0                             | With hypokalaemia (6,300) | NR                   | 1.4 years**            | HR (95% CI): 1.03 (0.97-1.09) | NR                     | NR    | Cardiac arrhythmia (HR: 0.94) |
| Kim et al. 2017, USA (DaVita)                 | Observational (cohort), multicentre              | CKD on HD              | Diabetes 58.0%; Hypertension 61.0%; Atherosclerotic                                                                                 | ≤ 3.6                            | White (1957)              | NR                   | 1.3 years**            | 37.7%                         | 1.3 years**            | 11.6% | NR                            |
|                                               |                                                  |                        |                                                                                                                                     | 3.6-4.0                          | White (8,467)             | NR                   | 1.3 years**            | 33.7%                         | 1.3 years**            | 11.0% | NR                            |
|                                               |                                                  |                        |                                                                                                                                     | 4.0-4.5                          | White (19,767)            | NR                   | 1.3 years**            | 32.1%                         | 1.3 years**            | 11.0% | NR                            |

| Author, year, country (trial ID)  | Study design                        | Population            | Co-morbid conditions                                                                                            | S-K <sup>+</sup> levels (mmol/L) | Subgroup population (N)   | Deaths due to HK (%) | All-cause mortality  |       | CV- mortality        |       | CV events |
|-----------------------------------|-------------------------------------|-----------------------|-----------------------------------------------------------------------------------------------------------------|----------------------------------|---------------------------|----------------------|----------------------|-------|----------------------|-------|-----------|
|                                   |                                     |                       |                                                                                                                 |                                  |                           |                      | Timepoint            | Value | Timepoint            | Value |           |
|                                   |                                     |                       | heart disease 13.0%; CHF 36.0%; Other cardiac disease 13.0%                                                     | 4.5-5.0                          | White (14,674)            | NR                   | 1.3 years**          | 32.3% | 1.3 years**          | 11.2% | NR        |
|                                   |                                     |                       |                                                                                                                 | 5.0-5.5                          | White (5,228)             | NR                   | 1.3 years**          | 32.6% | 1.3 years**          | 11.3% | NR        |
|                                   |                                     |                       |                                                                                                                 | >5.5                             | White (1204)              | NR                   | 1.3 years**          | 35.4% | 1.3 years**          | 13.0% | NR        |
|                                   |                                     |                       | Diabetes 55.0%; Hypertension 48.0%; Atherosclerotic heart disease 17.0%; CHF 37.0%; Other cardiac disease 18.0% | ≤ 3.6                            | Af-Am (2,323)             | NR                   | 1.3 years**          | 30.4% | 1.3 years**          | 9.2%  | NR        |
|                                   |                                     |                       |                                                                                                                 | 3.6-4.0                          | Af-Am (7,642)             | NR                   | 1.3 years**          | 23.3% | 1.3 years**          | 8.2%  | NR        |
|                                   |                                     |                       |                                                                                                                 | 4.0-4.5                          | Af-Am (13,762)            | NR                   | 1.3 years**          | 20.9% | 1.3 years**          | 7.3   | NR        |
|                                   |                                     |                       |                                                                                                                 | 4.5-5.0                          | Af-Am (7,949)             | NR                   | 1.3 years**          | 19.8% | 1.3 years**          | 7.1%  | NR        |
|                                   |                                     |                       |                                                                                                                 | 5.0-5.5                          | Af-Am (2,384)             | NR                   | 1.3 years**          | 20.6% | 1.3 years**          | 8.1%  | NR        |
|                                   |                                     |                       |                                                                                                                 | >5.5                             | Af-Am (509)               | NR                   | 1.3 years**          | 27.5% | 1.3 years**          | 9.2%  | NR        |
|                                   |                                     |                       | Diabetes 68.0%; Hypertension 45.0%; Atherosclerotic heart disease 12.0%; CHF 38.0%; Other cardiac disease 12.0% | ≤ 3.6                            | Hispanic (431)            | NR                   | 1.3 years**          | 36.7% | 1.3 years**          | 11.4% | NR        |
|                                   |                                     |                       |                                                                                                                 | 3.6-4.0                          | Hispanic (1959)           | NR                   | 1.3 years**          | 23.7% | 1.3 years**          | 9.9%  | NR        |
|                                   |                                     |                       |                                                                                                                 | 4.0-4.5                          | Hispanic (5,412)          | NR                   | 1.3 years**          | 19.4% | 1.3 years**          | 8.2%  | NR        |
|                                   |                                     |                       |                                                                                                                 | 4.5-5.0                          | Hispanic (5,094)          | NR                   | 1.3 years**          | 16.9% | 1.3 years**          | 7.1%  | NR        |
|                                   |                                     |                       |                                                                                                                 | 5.0-5.5                          | Hispanic (2,572)          | NR                   | 1.3 years**          | 16.2% | 1.3 years**          | 7.0%  | NR        |
|                                   |                                     |                       |                                                                                                                 | >5.5                             | Hispanic (902)            | NR                   | 1.3 years**          | 15.0% | 1.3 years**          | 6.1%  | NR        |
| Kovesdy et al. 2007, USA (DaVita) | Observational (cohort), multicentre | CKD On maintenance HD | NR                                                                                                              | 5.0-<5.3                         | With HK (11,621)          | NR                   | 3 years <sup>§</sup> | 30.0% | 3 years <sup>§</sup> | 13.0% | NR        |
|                                   |                                     |                       |                                                                                                                 | 5.3-<5.6                         | With HK (8,376)           | NR                   | 3 years <sup>§</sup> | 31.0% | 3 years <sup>§</sup> | 13.0% | NR        |
|                                   |                                     |                       |                                                                                                                 | 5.6-<6.0                         | With HK (6,082)           | NR                   | 3 years <sup>§</sup> | 32.0% | 3 years <sup>§</sup> | 13.0% | NR        |
|                                   |                                     |                       |                                                                                                                 | 6.0-<6.3                         | With HK (1900)            | NR                   | 3 years <sup>§</sup> | 33.0% | 3 years <sup>§</sup> | 14.0% | NR        |
|                                   |                                     |                       |                                                                                                                 | 6.3-<6.6                         | With HK (721)             | NR                   | 3 years <sup>§</sup> | 33.0% | 3 years <sup>§</sup> | 13.0% | NR        |
|                                   |                                     |                       |                                                                                                                 | ≥6.6                             | With HK (359)             | NR                   | 3 years <sup>§</sup> | 32.0% | 3 years <sup>§</sup> | 14.0% | NR        |
|                                   |                                     |                       |                                                                                                                 | ≥5.6                             | With HK (9,062)           | NR                   | 3 years <sup>§</sup> | 33.0% | 3 years <sup>§</sup> | 13.0% | NR        |
|                                   |                                     |                       |                                                                                                                 | <4.0                             | With hypokalaemia (6,617) | NR                   | 3 years <sup>§</sup> | 31.0% | 3 years <sup>§</sup> | 11.0% | NR        |

| Author, year, country (trial ID) | Study design                                       | Population                    | Co-morbid conditions                                            | S-K <sup>+</sup> levels (mmol/L) | Subgroup population (N) | Deaths due to HK (%) | All-cause mortality  |       | CV- mortality        |       | CV events |
|----------------------------------|----------------------------------------------------|-------------------------------|-----------------------------------------------------------------|----------------------------------|-------------------------|----------------------|----------------------|-------|----------------------|-------|-----------|
|                                  |                                                    |                               |                                                                 |                                  |                         |                      | Timepoint            | Value | Timepoint            | Value |           |
|                                  |                                                    |                               |                                                                 | 4.0-<4.3                         | Without HK (8,344)      | NR                   | 3 years <sup>§</sup> | 28.0% | 3 years <sup>§</sup> | 10.0% | NR        |
|                                  |                                                    |                               |                                                                 | 4.3-<4.6                         | Without HK (11,917)     | NR                   | 3 years <sup>§</sup> | 29.0% | 3 years <sup>§</sup> | 11.0% | NR        |
|                                  |                                                    |                               |                                                                 | 4.6-<5.0                         | Without HK (18,282)     | NR                   | 3 years <sup>§</sup> | 28.0% | 3 years <sup>§</sup> | 11.0% | NR        |
| Li et al. 2012, China            | Retrospective, observational, single centre        | ESRD on maintenance HD        | NR                                                              | NR                               | Total population (268)  | 4.5                  | NR                   | NR    | NR                   | NR    | NR        |
| Li et al. 2020, China            | Retrospective, observational, single centre        | CKD on maintenance HD         | Diabetes 63.8%; Hypertension 33.3%; other cardiac disease 26.2% | NR                               | Total population (210)  | 4.4                  | NR                   | NR    | NR                   | NR    | NR        |
| Lomonte et al. 2004, Italy       | Retrospective, observational, single centre        | ESRD/ Leprosy on HD           | NR                                                              | NR                               | Total population (8)    | 12.5                 | NR                   | NR    | NR                   | NR    | NR        |
| Morduchowicz et al. 1992, Israel | Retrospective, observational                       | End-stage renal failure on HD | NR                                                              | NR                               | Total population (84)   | 5                    | NR                   | NR    | NR                   | NR    | NR        |
| Onuigbo et al. 2013, Italy       | Prospective, observational                         | ESRD on HD                    | NR                                                              | NR                               | Total population (466)  | 3                    | NR                   | NR    | NR                   | NR    | NR        |
| Poulikakos et al. 2015, UK       | Pilot study                                        | CKD on maintenance HD         | Diabetes 37.0%                                                  | NR                               | Total population (75)   | 1.3                  | NR                   | NR    | NR                   | NR    | NR        |
| Pun et al. 2012, USA (DaVita)    | Retrospective, observational (cohort), multicentre | ESRD on maintenance HD        | Diabetes 55.2%; CHF 46.2%; CHD/CAD 34.5%; Arrhythmia 13.7%      | NR                               | Total population (363)  | 1.3                  | NR                   | NR    | NR                   | NR    | NR        |
| Shibata et al. 1983, Japan       | Retrospective, single centre                       | CKD on HD                     | Diabetic nephropathy 100%                                       | NR                               | Total population (62)   | 3.2                  | NR                   | NR    | NR                   | NR    | NR        |
| Trajceska et al. 2020, Macedonia | Observational (cohort), single centre              | ESRD on HD                    | NR                                                              | ≥5.5                             | With HK (82)            | NR                   | 3 years              | 19.5  | NR                   | NR    | NR        |
| Yalin et al. 2012, Turkey        | Retrospective                                      | Renal failure on emergency HD | Diabetes 23.2%; Hypertension 32.5%                              | NR                               | With HK (177)           | NR                   | NR                   | 41.8% | NR                   | NR    | NR        |



| Author, year, country (trial ID) | Study design                       | Population             | Co-morbid conditions | S-K <sup>+</sup> levels (mmol/L) | Subgroup population (N) | Deaths due to HK (%) | All-cause mortality   |                               | CV- mortality |       | CV events |
|----------------------------------|------------------------------------|------------------------|----------------------|----------------------------------|-------------------------|----------------------|-----------------------|-------------------------------|---------------|-------|-----------|
|                                  |                                    |                        |                      |                                  |                         |                      | Timepoint             | Value                         | Timepoint     | Value |           |
| Yusuf et al. 2016, USA (USRDS)   | Retrospective, cohort, multicentre | ESRD on maintenance HD | NR                   | ≥5.5                             | With HK (NR)            | NR                   | 9 months <sup>§</sup> | HR (95% CI): 0.99 (0.89-1.09) | NR            | NR    | NR        |
|                                  |                                    |                        |                      | ≥5.6                             | With HK (NR)            | NR                   | 9 months <sup>§</sup> | HR (95% CI): 1.03 (0.92-1.15) | NR            | NR    | NR        |
|                                  |                                    |                        |                      | ≥5.7                             | With HK (NR)            | NR                   | 9 months <sup>§</sup> | HR (95% CI): 1.13 (1.01-1.28) | NR            | NR    | NR        |
|                                  |                                    |                        |                      | ≥5.8                             | With HK (NR)            | NR                   | 9 months <sup>§</sup> | HR (95% CI): 1.18 (1.03-1.35) | NR            | NR    | NR        |
|                                  |                                    |                        |                      | ≥5.9                             | With HK (NR)            | NR                   | 9 months <sup>§</sup> | HR (95% CI): 1.29 (1.12-1.50) | NR            | NR    | NR        |
|                                  |                                    |                        |                      | ≥6.0                             | With HK (NR)            | NR                   | 9 months <sup>§</sup> | HR (95% CI): 1.37 (1.16-1.62) | NR            | NR    | NR        |
| Zulham et al. 2019, Indonesia    | Observational, single centre       | Diabetic ESRD on HD    | Diabetes 100%        | NR                               | With HK (96)            | NR                   | NR                    | 49.0                          | NR            | NR    | NR        |
|                                  |                                    |                        |                      | NR                               | Without HK (115)        | NR                   | NR                    | 25.2                          | NR            | NR    | NR        |

A: adherent group; A/NZ: Australia/New Zealand; ACEI: angiotensin-converting-enzyme inhibitor; Af-Am: African-American; ARB: angiotensin II receptor blockers; CAD: coronary artery disease; CHD: coronary heart disease; CHF: congestive heart failure; CI: confidence interval; CKD: chronic kidney disease; ESRD: end-stage renal disease; HD: haemodialysis; HK: hyperkalaemia; HR: hazard ratio; MI: myocardial infarction; NA: non-adherent group; NR: not reported; PAT: patiomer; PBO: placebo; PVD: peripheral vascular disease; RCT: randomised controlled trial; SPL: spironolactone; SPS: sodium polystyrene sulphonate

\* Australia, Belgium, Canada, France, Germany, Italy, Japan, New Zealand, Spain, Sweden, United Kingdom and USA

† France, Germany, Italy, Japan, Spain, United Kingdom, & USA in phases 1 to 5; Australia and New Zealand, Belgium, Canada, and Sweden in phases 2 to 5; and the Gulf Cooperation Council (including Bahrain, Kuwait, Oman, Qatar, Saudi Arabia and United Arab Emirates), China, Russia, and Turkey in phase 5

§ mean value

¶ median at-risk time for the overall cohort

\*\* median value

**Table S4.** Summary of baseline characteristics and main outcomes of identified studies (n=16) reporting mortality outcomes in the inter-dialytic period

| Author, year, country (trial ID)                                       | Study design                                               | Population (N)                  | HD schedule            | Inter-dialytic interval         | Sudden death (%) | All-cause mortality |                           | CV- mortality |                           | CV events                                                                                                                                                          |
|------------------------------------------------------------------------|------------------------------------------------------------|---------------------------------|------------------------|---------------------------------|------------------|---------------------|---------------------------|---------------|---------------------------|--------------------------------------------------------------------------------------------------------------------------------------------------------------------|
|                                                                        |                                                            |                                 |                        |                                 |                  | Timepoint           | Value                     | Timepoint     | Value                     |                                                                                                                                                                    |
| Bleyer et al. 1999, USA<br>(USRDS Case Mix Adequacy Study)             | Retrospective, observational, multicentre                  | ESRD on HD (6,137)              | MWF                    | Day after LIDI                  | 20.8             | NR                  | NR                        | NR            | 20.2%                     | NR                                                                                                                                                                 |
|                                                                        |                                                            |                                 |                        | Day after SIDI1                 | 16.7             | NR                  | NR                        | NR            | 14.9%                     | NR                                                                                                                                                                 |
|                                                                        |                                                            |                                 |                        | Day after SIDI2                 | 14.2             | NR                  | NR                        | NR            | 15.0%                     | NR                                                                                                                                                                 |
|                                                                        |                                                            |                                 |                        | End of LIDI                     | 12.7             | NR                  | NR                        | NR            | 13.3%                     | NR                                                                                                                                                                 |
|                                                                        |                                                            |                                 | TTS                    | Day after LIDI                  | 18.1             | NR                  | NR                        | NR            | 18.5%                     | NR                                                                                                                                                                 |
|                                                                        |                                                            |                                 |                        | Day after SIDI1                 | 13.5             | NR                  | NR                        | NR            | 14.0%                     | NR                                                                                                                                                                 |
|                                                                        |                                                            |                                 |                        | Day after SIDI2                 | 13.5             | NR                  | NR                        | NR            | 13.5%                     | NR                                                                                                                                                                 |
|                                                                        |                                                            |                                 |                        | End of LIDI                     | 13.7             | NR                  | NR                        | NR            | 15.2%                     | NR                                                                                                                                                                 |
| Bleyer et al. 2006, USA                                                | Retrospective, observational, multicentre                  | ESRD on HD (80)                 | MWF or TTS             | Day after LIDI (0-12h interval) | 11.3             | NR                  | NR                        | NR            | NR                        | NR                                                                                                                                                                 |
|                                                                        |                                                            |                                 |                        | End of LIDI (60-72h interval)   | 20.6             | NR                  | NR                        | NR            | NR                        | NR                                                                                                                                                                 |
| Foley et al. 2011, USA<br>(ESRD Clinical Performance Measures Project) | Retrospective observational (cross-sectional), multicentre | ESRD on maintenance HD (32,065) | 59.2% MWF<br>40.8% TTS | Day after LIDI                  | NR               | 1 year              | 22.1 per 100 person-years | 1 year        | 10.2 per 100 person-years | Cardiac arrest per 100 person-years: 1.3 on day after LIDI vs. 1.0 on any other day<br><br>MI per 100 person-years: 6.3 on day after LIDI vs. 4.4 on any other day |
|                                                                        |                                                            |                                 |                        | Day after SIDI1                 |                  |                     | 19.3 per 100 person-years |               | 8.1 per 100 person-years  |                                                                                                                                                                    |
|                                                                        |                                                            |                                 |                        | Day after SIDI2                 |                  |                     | 18.3 per 100 person-years |               | 7.9 per 100 person-years  |                                                                                                                                                                    |
|                                                                        |                                                            |                                 |                        | End of LIDI                     |                  |                     | 17.7 per 100 person-years |               | 7.7 per 100 person-years  |                                                                                                                                                                    |
| Fotheringham et al. 2020, Europe*                                      | Prospective observational (cohort), multicentre            | CKD on maintenance HD (9,398)   | MWF or TTS             | Day after LIDI                  | NR               | NR                  | 8.3 per 100 person-years  | NR            | NR                        | NR                                                                                                                                                                 |
|                                                                        |                                                            |                                 |                        | Day after SIDI                  | NR               | NR                  | 4.3 per 100 person-years  | NR            | NR                        | NR                                                                                                                                                                 |
| Fotheringham et al. 2019, Europe*<br>(EURODOPPS)                       | Prospective observational (cohort), multicentre            | CKD on maintenance HD (19,557)  | 55.5% MWF<br>44.7% TTS | Day after LIDI                  | NR               | NR                  | 17 per 100 person-years   | NR            | NR                        | NR                                                                                                                                                                 |
|                                                                        |                                                            |                                 |                        | Day after SIDI                  | NR               | NR                  | 14 per 100 person-years   | NR            | NR                        | NR                                                                                                                                                                 |
| Genovesi et al. 2009, Italy                                            | Retrospective, observational, multicentre                  | CKD on chronic HD (476)         | MWF or TTS             | During LIDI                     | 40.6             | NR                  | NR                        | NR            | NR                        | NR                                                                                                                                                                 |
|                                                                        |                                                            |                                 |                        | During SIDI 1                   | 34.4             | NR                  | NR                        | NR            | NR                        | NR                                                                                                                                                                 |
|                                                                        |                                                            |                                 |                        | During SIDI 2                   | 25.0             | NR                  | NR                        | NR            | NR                        | NR                                                                                                                                                                 |
| Karnik et al. 2001, USA                                                | Prospective observational                                  | ESRD on HD (400)                | MWF                    | Day after LIDI                  | NR               | NR                  | NR                        | NR            | NR                        | Cardiac arrest %: 23.3                                                                                                                                             |
|                                                                        |                                                            |                                 |                        | Day after SIDI1                 | NR               | NR                  | NR                        | NR            | NR                        | Cardiac arrest %: 13.5                                                                                                                                             |

| Author, year, country (trial ID)             | Study design                                       | Population (N)                                       | HD schedule    | Inter-dialytic interval | Sudden death (%) | All-cause mortality |       | CV- mortality |       | CV events                                                   |
|----------------------------------------------|----------------------------------------------------|------------------------------------------------------|----------------|-------------------------|------------------|---------------------|-------|---------------|-------|-------------------------------------------------------------|
|                                              |                                                    |                                                      |                |                         |                  | Timepoint           | Value | Timepoint     | Value |                                                             |
| (FMCNA)                                      | (cohort), single centre                            |                                                      | TTS            | Day after SIDI2         | NR               | NR                  | NR    | NR            | NR    | Cardiac arrest %: 14.5                                      |
|                                              |                                                    |                                                      |                | Day after LIDI          | NR               | NR                  | NR    | NR            | NR    | Cardiac arrest %: 16.3                                      |
|                                              |                                                    |                                                      |                | Day after SIDI1         | NR               | NR                  | NR    | NR            | NR    | Cardiac arrest %: 14.3                                      |
|                                              |                                                    |                                                      |                | Day after SIDI2         | NR               | NR                  | NR    | NR            | NR    | Cardiac arrest %: 17.0                                      |
| Krishnasamy et al. 2013, Australia (ANZDATA) | Retrospective, observational (cohort), multicentre | ESRD on maintenance HD (10,338 patient deaths)       | MWF or TTS     | Day after LIDI - Mon    | NR               | NR                  | NR    | NR            | 9.7%  | MI (OR): 1.19                                               |
|                                              |                                                    |                                                      |                | Day after LIDI - Tue    | NR               | NR                  | NR    | NR            | 8.8%  | MI (OR): 1.13                                               |
|                                              |                                                    |                                                      |                | Day after SIDI1 - Wed   | NR               | NR                  | NR    | NR            | 8.0%  | MI (OR): 1.02                                               |
|                                              |                                                    |                                                      |                | Day after SIDI1 - Thurs | NR               | NR                  | NR    | NR            | 8.0%  | MI (OR): 1.05                                               |
|                                              |                                                    |                                                      |                | Day after SIDI2 - Fri   | NR               | NR                  | NR    | NR            | 7.7%  | MI (OR): 1.06                                               |
|                                              |                                                    |                                                      |                | Day after SIDI2 - Sat   | NR               | NR                  | NR    | NR            | 7.6%  | MI (OR): 0.86                                               |
|                                              |                                                    |                                                      |                | End of LIDI - Sun       | NR               | NR                  | NR    | NR            | 6.7%  | MI (OR): 0.76                                               |
| Kumar et al. 2013, India                     | Prospective observational                          | ESRD on maintenance HD (240)                         | MT or TF or WS | Day after LIDI          | NR               | NR                  | NR    | 2 years       | 12.9% | NR                                                          |
|                                              |                                                    |                                                      |                | Day after SIDI          | NR               | NR                  | NR    | 2 years       | 6.3%  | NR                                                          |
| Lafrance, et al. 2006, Canada                | Retrospective, observational, single centre        | CKD on HD (257)                                      | MWF or TTS     | Day after LIDI          | NR               | NR                  | NR    | NR            | NR    | CPR 52.6%                                                   |
|                                              |                                                    |                                                      |                | Day after SIDI1         | NR               | NR                  | NR    | NR            | NR    | CPR 21.1%                                                   |
|                                              |                                                    |                                                      |                | Day after SIDI2         | NR               | NR                  | NR    | NR            | NR    | CPR 26.3%                                                   |
| Rhee et al. 2017, USA                        | Prospective, observational, multicentre            | CKD on maintenance HD (MWF: n=61,152; TTS: n=43,968) | MWF            | Day after LIDI          | NR               | NR                  | 23.7% | NR            | NR    | NR                                                          |
|                                              |                                                    |                                                      |                | Day after SIDI1         | NR               | NR                  | 14.7% | NR            | NR    | NR                                                          |
|                                              |                                                    |                                                      |                | Day after SIDI2         | NR               | NR                  | 15.4% | NR            | NR    | NR                                                          |
|                                              |                                                    |                                                      |                | End of LIDI             | NR               | NR                  | 15.4% | NR            | NR    | NR                                                          |
|                                              |                                                    |                                                      | TTS            | Day after LIDI          | NR               | NR                  | 22.3% | NR            | NR    | NR                                                          |
|                                              |                                                    |                                                      |                | Day after SIDI1         | NR               | NR                  | 16.2% | NR            | NR    | NR                                                          |
|                                              |                                                    |                                                      |                | Day after SIDI2         | NR               | NR                  | 15.9% | NR            | NR    | NR                                                          |
|                                              |                                                    |                                                      |                | End of LIDI             | NR               | NR                  | 15.1% | NR            | NR    | NR                                                          |
| Roy-Chaudhury et al. 2018, USA and India     | Prospective, multicentre,                          | ESRD on HD (66)                                      | MWF or TTS     | Day after LIDI          | NR               | NR                  | NR    | NR            | NR    | Arrhythmia: 0.0023 rate per hour; AF: 0.00019 rate per hour |

| Author, year, country (trial ID)                      | Study design                                             | Population (N)          | HD schedule | Inter-dialytic interval        | Sudden death (%) | All-cause mortality |       | CV- mortality |          | CV events                                                   |                                                             |                                 |                                 |
|-------------------------------------------------------|----------------------------------------------------------|-------------------------|-------------|--------------------------------|------------------|---------------------|-------|---------------|----------|-------------------------------------------------------------|-------------------------------------------------------------|---------------------------------|---------------------------------|
|                                                       |                                                          |                         |             |                                |                  | Timepoint           | Value | Timepoint     | Value    |                                                             |                                                             |                                 |                                 |
| (MiD, NCT01779856)                                    | single group, open-label trial                           |                         |             | Day after SIDI1                | NR               | NR                  | NR    | NR            | NR       | Arrhythmia: 0.0004 rate per hour; AF: 0.00024 rate per hour |                                                             |                                 |                                 |
|                                                       |                                                          |                         |             | Day after SIDI2                | NR               | NR                  | NR    | NR            | NR       | NR                                                          | Arrhythmia: 0.0002 rate per hour; AF: 0.00018 rate per hour |                                 |                                 |
|                                                       |                                                          |                         |             | End of LIDI (60-72h interval)  | NR               | NR                  | NR    | NR            | NR       | NR                                                          | Arrhythmia: 0.0012 rate per hour; AF: 0.00014 rate per hour |                                 |                                 |
|                                                       |                                                          |                         |             | End of SIDI1 (36-48h interval) | NR               | NR                  | NR    | NR            | NR       | NR                                                          | Arrhythmia: 0.0008 rate per hour; AF: 0.00013 rate per hour |                                 |                                 |
|                                                       |                                                          |                         |             | End of SIDI2 (36-48h interval) | NR               | NR                  | NR    | NR            | NR       | NR                                                          | Arrhythmia: 0.0008 rate per hour; AF: 0.0008 rate per hour  |                                 |                                 |
| Tangweerapong et al. 2017, Thailand                   | Prospective, observational, single centre                | ESRD on chronic HD (28) | MWF or TTS  | During LIDI                    | NR               | NR                  | NR    | NR            | NR       | Cardiac Arrhythmia 28.6%; Ventricular arrhythmia 10.7%      |                                                             |                                 |                                 |
| Tumlin et al. 2019, USA and India (MiD, NCT01779856)  | Prospective, multicentre, single group, open-label trial | ESRD on HD (66)         | MWF or TTS  | Day after LIDI                 | NR               | NR                  | NR    | NR            | NR       | NR                                                          | Arrhythmia: 0.014 rate per hour                             |                                 |                                 |
|                                                       |                                                          |                         |             | End of LIDI (60-72h interval)  | NR               | NR                  | NR    | NR            | NR       | NR                                                          | NR                                                          | Arrhythmia: 0.019 rate per hour |                                 |
|                                                       |                                                          |                         |             | Day after SIDI1                | NR               | NR                  | NR    | NR            | NR       | NR                                                          | NR                                                          | Arrhythmia: 0.012 rate per hour |                                 |
|                                                       |                                                          |                         |             | End of SIDI1 (36-48h interval) | NR               | NR                  | NR    | NR            | NR       | NR                                                          | NR                                                          | NR                              | Arrhythmia: 0.017 rate per hour |
|                                                       |                                                          |                         |             | Day after SIDI2                | NR               | NR                  | NR    | NR            | NR       | NR                                                          | NR                                                          | NR                              | Arrhythmia: 0.014 rate per hour |
|                                                       |                                                          |                         |             | End of SIDI2 (36-48h interval) | NR               | NR                  | NR    | NR            | NR       | NR                                                          | NR                                                          | NR                              | Arrhythmia: 0.021 rate per hour |
| Wong et al. 2015, Australia (ACTRN1261300132 6785)    | Prospective observational (cohort), multicentre          | CKD on HD (50)          | MWF or TTS  | End of LIDI                    | NR               | NR                  | NR    | NR            | NR       | NR                                                          | Arrhythmia 16.6%                                            |                                 |                                 |
|                                                       |                                                          |                         |             | Day after LIDI                 | NR               | NR                  | NR    | NR            | NR       | NR                                                          | NR                                                          | Arrhythmia 36.0%                |                                 |
|                                                       |                                                          |                         |             | Day after SIDI1                | NR               | NR                  | NR    | NR            | NR       | NR                                                          | NR                                                          | Arrhythmia 13.6%                |                                 |
|                                                       |                                                          |                         |             | Day after SIDI2                | NR               | NR                  | NR    | NR            | NR       | NR                                                          | NR                                                          | Arrhythmia 15.2%                |                                 |
| Zhang et al. 2012, International <sup>†</sup> (DOPPS) | Prospective, observational (cohort), multicentre         | CKD on maintenance HD   | MWF         | Day after LIDI (USA)           | NR               | NR                  | 19.7% | NR            | RR: 1.45 | NR                                                          |                                                             |                                 |                                 |
|                                                       |                                                          |                         |             | Day after SIDI1 (USA)          | NR               | NR                  | 14.8% | NR            | RR: 1.06 | NR                                                          |                                                             |                                 |                                 |

| Author, year, country (trial ID) | Study design | Population (N)                                  | HD schedule | Inter-dialytic interval  | Sudden death (%) | All-cause mortality |       | CV- mortality |          | CV events |
|----------------------------------|--------------|-------------------------------------------------|-------------|--------------------------|------------------|---------------------|-------|---------------|----------|-----------|
|                                  |              |                                                 |             |                          |                  | Timepoint           | Value | Timepoint     | Value    |           |
|                                  |              | (USA: n=4,666; Europe: n=5,623; Japan: n=3,531) |             | Day after SIDI2 (USA)    | NR               | NR                  | 14.6% | NR            | RR: 1.05 | NR        |
|                                  |              |                                                 |             | End of LIDI (USA)        | NR               | NR                  | 12.4% | NR            | RR: 0.94 | NR        |
|                                  |              |                                                 |             | Day after LIDI (Europe)  | NR               | NR                  | 19.6% | NR            | RR: 1.55 | NR        |
|                                  |              |                                                 |             | Day after SIDI1 (Europe) | NR               | NR                  | 14.8% | NR            | RR: 0.87 | NR        |
|                                  |              |                                                 |             | Day after SIDI2 (Europe) | NR               | NR                  | 14.2% | NR            | RR: 1.33 | NR        |
|                                  |              |                                                 |             | End of LIDI (Europe)     | NR               | NR                  | 12.4% | NR            | RR: 0.89 | NR        |
|                                  |              |                                                 |             | Day after LIDI (Japan)   | NR               | NR                  | 17.9% | NR            | RR: 1.62 | NR        |
|                                  |              |                                                 |             | Day after SIDI1 (Japan)  | NR               | NR                  | 13.3% | NR            | RR: 0.84 | NR        |
|                                  |              |                                                 |             | Day after SIDI2 (Japan)  | NR               | NR                  | 19.1% | NR            | RR: 0.75 | NR        |
|                                  |              |                                                 |             | End of LIDI (Japan)      | NR               | NR                  | 12.1% | NR            | RR: 1.12 | NR        |
|                                  |              |                                                 | TTS         | Day after LIDI (USA)     | NR               | NR                  | 19.2% | NR            | RR: 1.56 | NR        |
|                                  |              |                                                 |             | Day after SIDI1 (USA)    | NR               | NR                  | 14.2% | NR            | RR: 1.03 | NR        |
|                                  |              |                                                 |             | Day after SIDI2 (USA)    | NR               | NR                  | 14.6% | NR            | RR: 1.09 | NR        |
|                                  |              |                                                 |             | End of LIDI (USA)        | NR               | NR                  | 15.7% | NR            | RR: 1.16 | NR        |
|                                  |              |                                                 |             | Day after LIDI (Europe)  | NR               | NR                  | 16.9% | NR            | RR: 1.43 | NR        |
|                                  |              |                                                 |             | Day after SIDI1 (Europe) | NR               | NR                  | 11.9% | NR            | RR: 0.75 | NR        |
|                                  |              |                                                 |             | Day after SIDI2 (Europe) | NR               | NR                  | 18.0% | NR            | RR: 1.88 | NR        |
|                                  |              |                                                 |             | End of LIDI (Europe)     | NR               | NR                  | 13.6% | NR            | RR: 0.85 | NR        |
|                                  |              |                                                 |             | Day after LIDI (Japan)   | NR               | NR                  | 19.1% | NR            | RR: 0.75 | NR        |

| Author, year, country (trial ID) | Study design | Population (N) | HD schedule | Inter-dialytic interval | Sudden death (%) | All-cause mortality |       | CV- mortality |          | CV events |
|----------------------------------|--------------|----------------|-------------|-------------------------|------------------|---------------------|-------|---------------|----------|-----------|
|                                  |              |                |             |                         |                  | Timepoint           | Value | Timepoint     | Value    |           |
|                                  |              |                |             | Day after SIDI1 (Japan) | NR               | NR                  | 15.5% | NR            | RR: 1.00 | NR        |
|                                  |              |                |             | Day after SIDI2 (Japan) | NR               | NR                  | 17.9% | NR            | RR: 1.93 | NR        |
|                                  |              |                |             | End of LIDI (Japan)     | NR               | NR                  | 10.7% | NR            | RR: 0.98 | NR        |

AF: atrial fibrillation; CKD: chronic kidney disease; CPR: cardiopulmonary resuscitation; ESDR: end-stage renal disease; HD: haemodialysis; LIDI: long inter-dialytic interval; MI: myocardial infarction; MT: Monday, Thursday; MWF: Monday, Wednesday, Friday; NR: not reported; OR: odds ratio; RR: relative risk; SIDI: short inter-dialytic interval; TF: Tuesday, Friday; TTS: Tuesday, Thursday, Saturday; WS: Wednesday, Saturday

\* Belgium, France, Germany, Italy, Sweden, Spain, and United Kingdom

† USA, Japan, Belgium, France, Germany, Italy, Spain, Sweden, and United Kingdom
